# Supplementary material for: Amalgamation of MnWO4 nanorods with amorphous carbon nanotubes for highly stabilized energy efficient supercapacitor electrodes
Source: Royal Society of Chemistry journal article supplement (doi:10.1039/d1dt00267h), 2021-01-01
Supplement: d1dt00267h4.pdf [file d1dt00267h4.pdf]

## Supplementary Materials

### Amalgamation of MnWO<sub>4</sub> nanorods with amorphous carbon nanotubes for highly stabilized energy efficient supercapacitor electrode

Kausik Sardar<sup>1</sup>, Subhasish Thakur<sup>1</sup>, Soumen Maiti<sup>2</sup>, Nripen Besra<sup>3</sup>, Partha Baire<sup>3</sup>, Kausik Chanda<sup>3</sup>,  
Gautam Majumdar<sup>4</sup>, Kalyan Kumar Chattopadhyay<sup>1,3\*</sup>

<sup>1</sup>*School of Materials Science and Nanotechnology, Jadavpur University, Kolkata 700032, India*

<sup>2</sup>*St Thomas College of Engineering & Technology, Kolkata 700023, India*

<sup>3</sup>*Department of Physics, Jadavpur University, Kolkata 700032, India*

<sup>4</sup>*Department of Mechanical Engineering, Jadavpur University, Kolkata 700032, India*

\*Corresponding author E-mail: [kalyan\\_chattopadhyay@yahoo.com](mailto:kalyan_chattopadhyay@yahoo.com)

### Electrode preparation

The working electrodes were prepared using MnWO<sub>4</sub>-aCNT, polytetrafluoroethylene (PVDF) and carbon black with a ratio of 8:1:1. The aforesaid reagents were mixed with 300 μL NMP and stirred for 6 hours to obtain a black paste. This mixture was coated on pre-cleaned and dry Ni Foam and dried at 70 °C for 12 hours.

### Characterizations

X-ray diffraction study was performed using X-ray diffractometer (Bruker D8: Advance). Morphology of the products was examined by field emission scanning electron microscope (FESEM, Hitachi S-4800). EDS study was performed using energy dispersive spectroscopy (EDS, Thermo Scientific attached with the FESEM). To get more details about morphology and crystal structure transmission electron microscope (JEOL, JEM 2100) study was further performed. Raman spectra were recorded using Raman spectrometer (alpha 300, Witec). BET

measurements were carried out using Nova 1000e, Quantachrome. Electrochemical tests were studied in Gamry Interface 1000 (potentiostat/galvanostat/ZRA).

### **Electrolyte gel preparation for ASC device**

For the preparation of electrolyte gel, PVA, KOH and DI water was used. A mixture of PVA, KOH and DI water was stirred vigorously. Mixture temperature was maintained at 90 °C and the solution was stirred until the solution became transparent and homogeneous. After the gel formation, it was cooled to room temperature which eliminated the as formed excess bubbles.

**Table S1:**

| <b>Sample</b>                | <b>Scan rate (mVs<sup>-1</sup>)</b> | <b>Specific capacitance (Fg<sup>-1</sup>)</b> |
|------------------------------|-------------------------------------|-----------------------------------------------|
| <b>aCNT</b>                  | <b>5</b>                            | <b>113.86</b>                                 |
|                              | <b>10</b>                           | <b>76.34</b>                                  |
|                              | <b>20</b>                           | <b>52.18</b>                                  |
|                              | <b>50</b>                           | <b>31.27</b>                                  |
|                              | <b>75</b>                           | <b>24.31</b>                                  |
|                              | <b>100</b>                          | <b>20.35</b>                                  |
| <b>MnWO<sub>4</sub></b>      | <b>2</b>                            | <b>231.15</b>                                 |
|                              | <b>5</b>                            | <b>196.13</b>                                 |
|                              | <b>10</b>                           | <b>166.58</b>                                 |
|                              | <b>20</b>                           | <b>139.72</b>                                 |
|                              | <b>50</b>                           | <b>102.38</b>                                 |
|                              | <b>75</b>                           | <b>85.43</b>                                  |
|                              | <b>100</b>                          | <b>73.88</b>                                  |
| <b>MnWO<sub>4</sub>-aCNT</b> | <b>2</b>                            | <b>542.18</b>                                 |
|                              | <b>5</b>                            | <b>388.81</b>                                 |
|                              | <b>10</b>                           | <b>298.95</b>                                 |
|                              | <b>20</b>                           | <b>233.88</b>                                 |
|                              | <b>50</b>                           | <b>157.94</b>                                 |
|                              | <b>75</b>                           | <b>130.04</b>                                 |
|                              | <b>100</b>                          | <b>112.52</b>                                 |

**Table S2: Values of equivalent circuit components.**

| <b>Component</b>                            | <b>Value</b>                 |                                |
|---------------------------------------------|------------------------------|--------------------------------|
|                                             | <b>MnWO<sub>4</sub>-aCNT</b> | <b>MnWO<sub>4</sub></b>        |
| <b>R<sub>1</sub> (ohm)</b>                  | <b>0.3265</b>                | <b>0.9711</b>                  |
| <b>R<sub>2</sub> (ohm)</b>                  | <b>1.434</b>                 | <b>2.033</b>                   |
| <b>R<sub>3</sub> (ohm)</b>                  | <b>0.5731</b>                | <b>0.7835</b>                  |
| <b>W<sub>1</sub> (ohm S<sup>-1/2</sup>)</b> | <b>11.13</b>                 | <b>28.7</b>                    |
| <b>W<sub>2</sub> (ohm S<sup>-1/2</sup>)</b> | <b>0.7003</b>                | <b>0.9812</b>                  |
| <b>C<sub>1</sub> (F)</b>                    | <b>0.162×10<sup>-3</sup></b> | <b>0.6021×10<sup>-24</sup></b> |
| <b>C<sub>2</sub> (F)</b>                    | <b>8.366×10<sup>-3</sup></b> | <b>2.479×10<sup>-3</sup></b>   |
| <b>C<sub>3</sub> (F)</b>                    | <b>3.039</b>                 | <b>1.121</b>                   |

**Table S3: Electrochemical performance comparison:**

| <b>Electrode material</b>               | <b>Electrolyte</b>                              | <b>Specific capacitance</b>                         | <b>Potential window</b> | <b>Energy density</b>          | <b>Cycling stability</b>              | <b>Ref.</b>      |
|-----------------------------------------|-------------------------------------------------|-----------------------------------------------------|-------------------------|--------------------------------|---------------------------------------|------------------|
| SWCNT                                   | KOH + p-phenylenediamine                        | 162.66 Fg <sup>-1</sup> at 1 Ag <sup>-1</sup>       | -0.8 to 0.2 V           | 4.23 W h kg <sup>-1</sup>      | 96.51% after 4000 cycles              | 1                |
| MWCNTs                                  | KOH + m-phenylenediamine                        | 78 Fg <sup>-1</sup> at 0.5 Ag <sup>-1</sup>         | -0.5 to 0.5 V           | 9.99 W h kg <sup>-1</sup>      | 90.68% after 10000 cycles             | 2                |
| MWCNTs                                  | H <sub>2</sub> SO <sub>4</sub> + indigo carmine | 50 Fg <sup>-1</sup> at 0.88 mA cm <sup>-2</sup>     | 0 to 1 V                | 1.7 W h kg <sup>-1</sup>       | 30% after 10000 cycles                | 3                |
| NGPC15                                  | KOH                                             | 227.9 Fg <sup>-1</sup> at 2 mV s <sup>-1</sup>      | -1 to 0 V               | -                              | 106% after 5000 cycles                | 4                |
| Boron-doped carbon                      | H <sub>2</sub> SO <sub>4</sub>                  | 228 Fg <sup>-1</sup> at 1 mV s <sup>-1</sup>        | 0 to 1 V                | 8.65 W h kg <sup>-1</sup>      | 100% after 1000 cycles                | 5                |
| Carbon nanotube                         | KOH                                             | 180 Fg <sup>-1</sup>                                | 0 to 0.9 V              | 6.5 W h kg <sup>-1</sup>       | -                                     | 6                |
| N <sub>2</sub> -doped carbon nanofibers | KOH                                             | 202 Fg <sup>-1</sup> at 1 Ag <sup>-1</sup>          | -1 to 0 V               | 7.11 W h kg <sup>-1</sup>      | 97% after 3000 cycles                 | 7                |
| Mesoporous carbon                       | KOH                                             | 128 Fg <sup>-1</sup> at 50 mA g <sup>-1</sup>       | 0.2 to 1 V              | 1.16 W h kg <sup>-1</sup>      | -                                     | 8                |
| Mesoporous fullerene                    | KOH                                             | 172 Fg <sup>-1</sup> at 0.5 Ag <sup>-1</sup>        | -1 to 0 V               | -                              | Significant drop after 1000 cycles    | 9                |
| TiO <sub>2</sub> anchored to CNT        | KOH                                             | 130.4 Fg <sup>-1</sup> at 1 Ag <sup>-1</sup>        | -0.05 to 0.5 V          | 4.47 W h kg <sup>-1</sup>      |                                       | 10               |
| MnWO <sub>4</sub> /RGO                  | KOH                                             | 288 Fg <sup>-1</sup> at 5 mV s <sup>-1</sup>        | -0.35 to 0.55 V         | -                              | 14.9% after 6000 cycles               | 11               |
| MnWO <sub>4</sub>                       | Na <sub>2</sub> SO <sub>4</sub>                 | 386 Fg <sup>-1</sup> at 5 mVs <sup>-1</sup>         | 0 to 1 V                | -                              | 90% after 2000 cycles                 | 12               |
| MnWO <sub>4</sub>                       | KOH                                             | 295 Fg <sup>-1</sup> at 5 mVs <sup>-1</sup>         | -0.2 to 0.6 V           | 16 Wh kg <sup>-1</sup>         | > 100% after 3000 cycles              | 13               |
| WO <sub>3</sub> -RGO composite          | H <sub>2</sub> SO <sub>4</sub>                  | 495 Fg <sup>-1</sup> at 1 Ag <sup>-1</sup>          | -0.4 to 0.3 V           | -                              | 87.5% after 1000 cycles               | 14               |
| MnWO <sub>4</sub> micro flower          | Na <sub>2</sub> SO <sub>4</sub>                 | 324 Fg <sup>-1</sup> at 1 mA cm <sup>-2</sup>       | 0 to 1 V                | 34 W h kg <sup>-1</sup>        | 93% after 8000                        | 15               |
| <b>MnWO<sub>4</sub>@aCNT</b>            | <b>KOH</b>                                      | <b>542.18 Fg<sup>-1</sup> at 2 mVs<sup>-1</sup></b> | <b>-0.1 to 0.6 V</b>    | <b>5.6 W h kg<sup>-1</sup></b> | <b>Above 100% after 15,000 cycles</b> | <b>This work</b> |

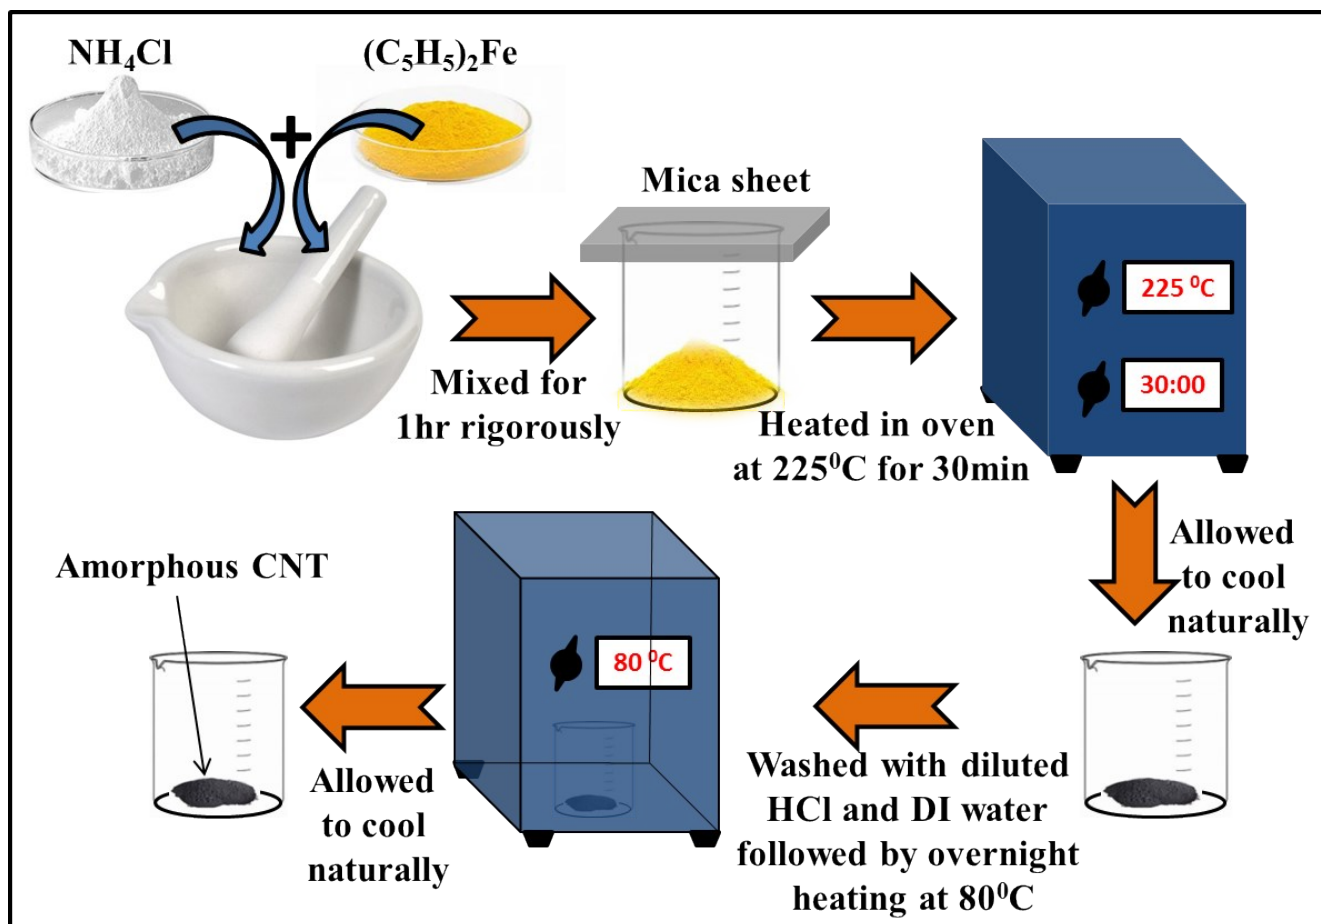

**Figure S1:** Schematic of synthesis protocol of aCNT.

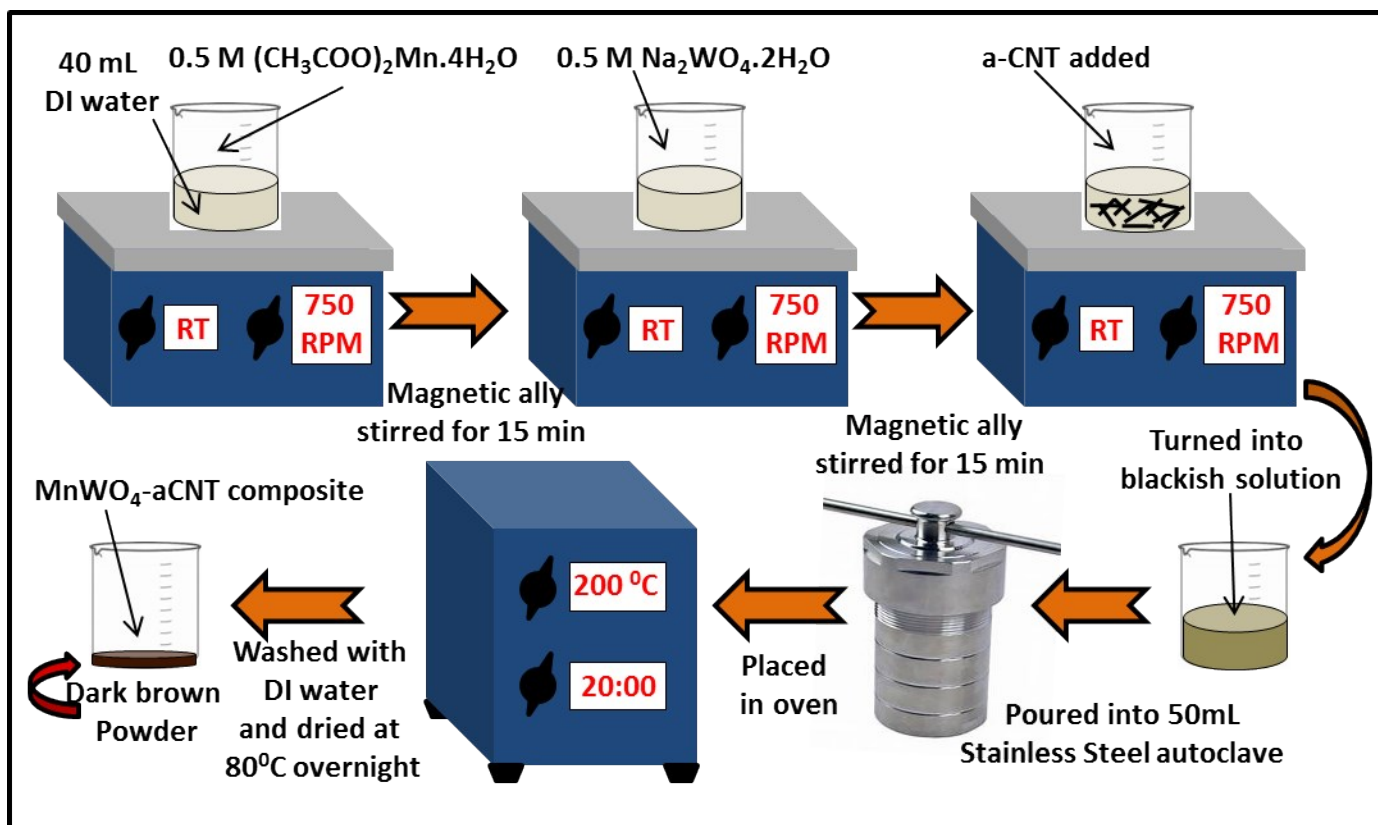

Figure S2: Schematic of synthesis protocol of MnWO<sub>4</sub>-aCNT hybrid.

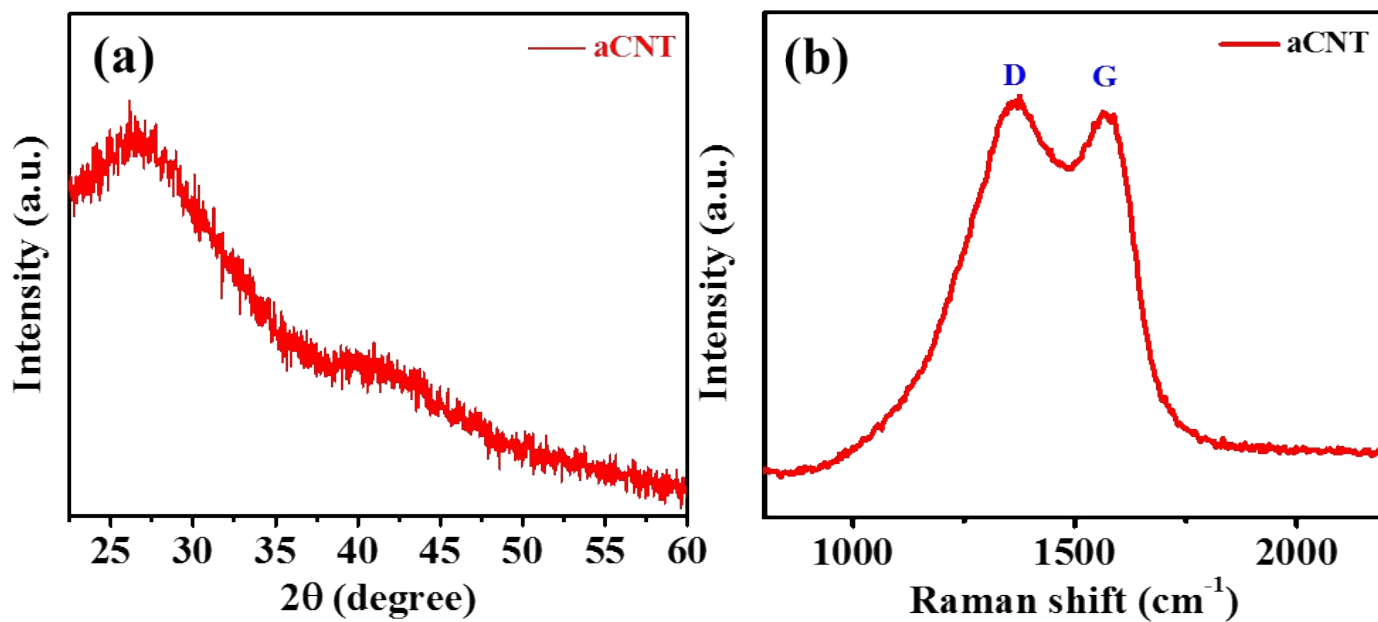

Figure S3: (a) XRD and (b) RAMAN spectra of aCNT.



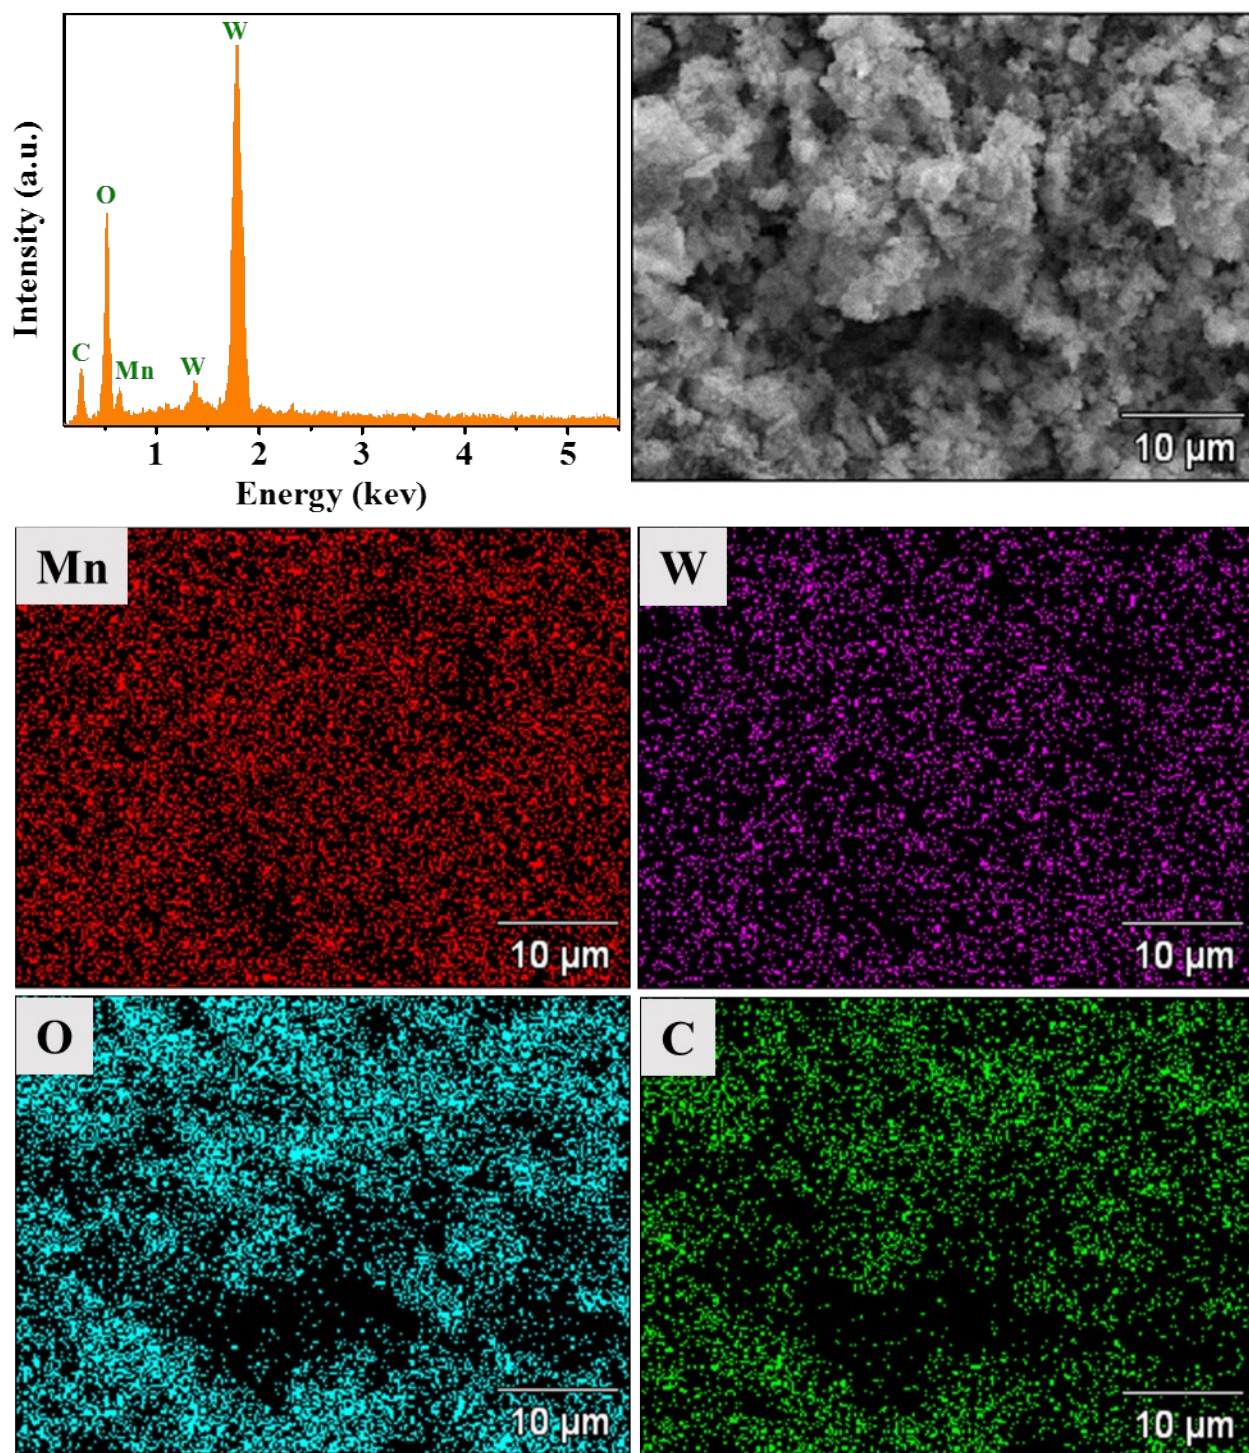

**Figure S4:** EDS spectrum and associated elemental mapping of MnWO<sub>4</sub>-aCNT.

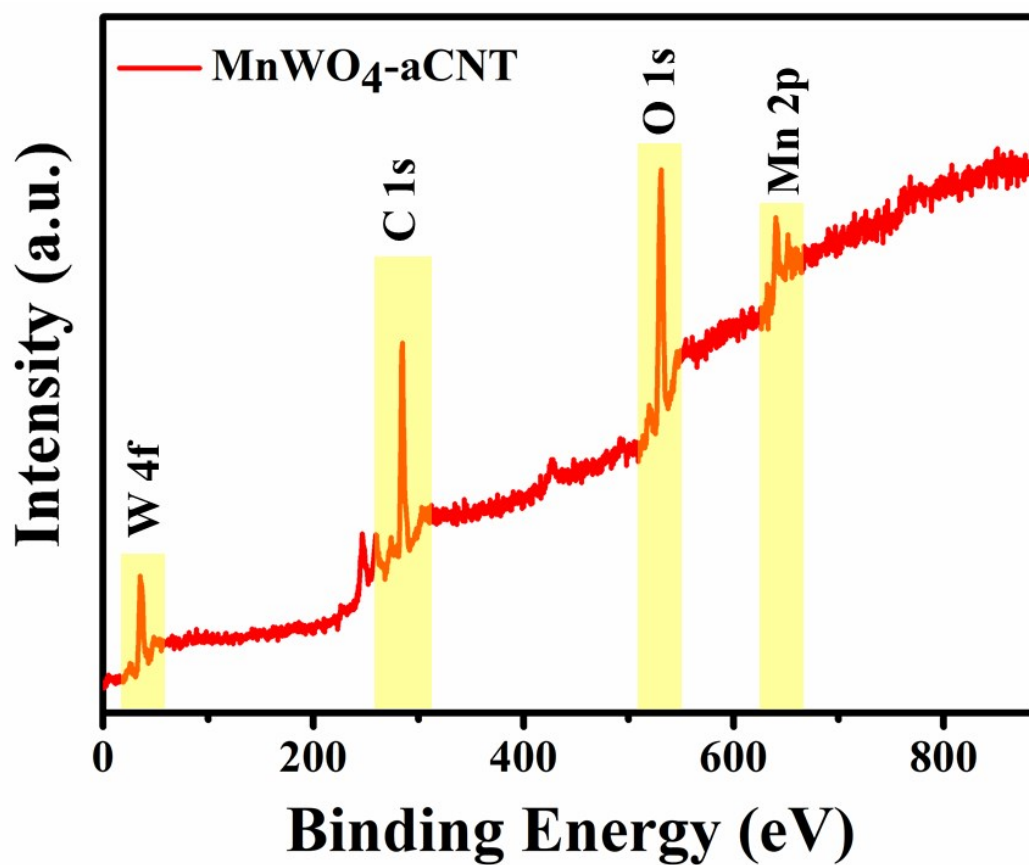

Figure S5: XPS survey scan of MnWO<sub>4</sub>-aCNT.

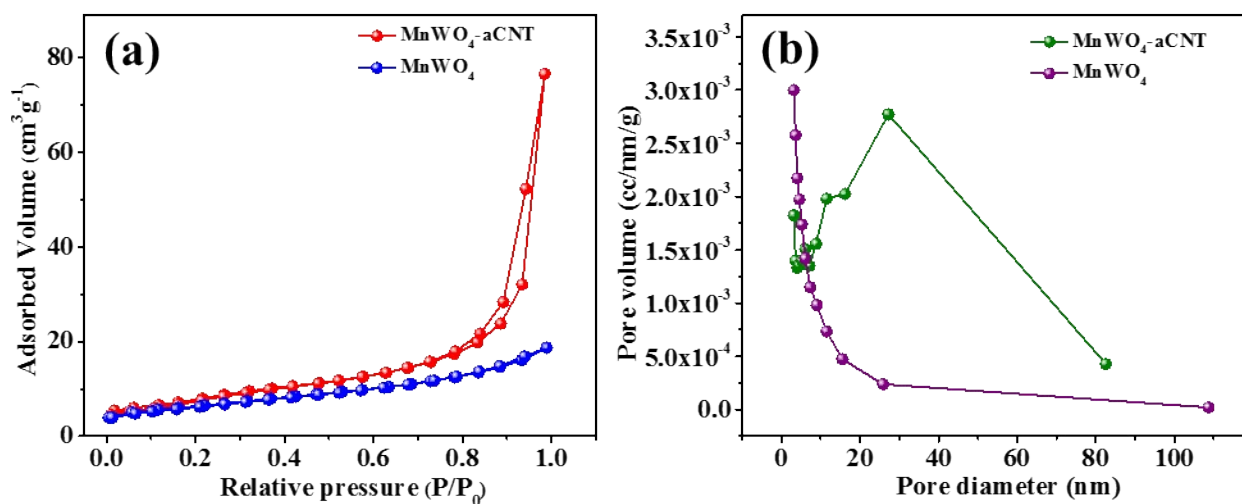

Figure S6: (a) N<sub>2</sub> adsorption–desorption isotherms and (b) pore distributions of MnWO<sub>4</sub>-aCNT and MnWO<sub>4</sub>.

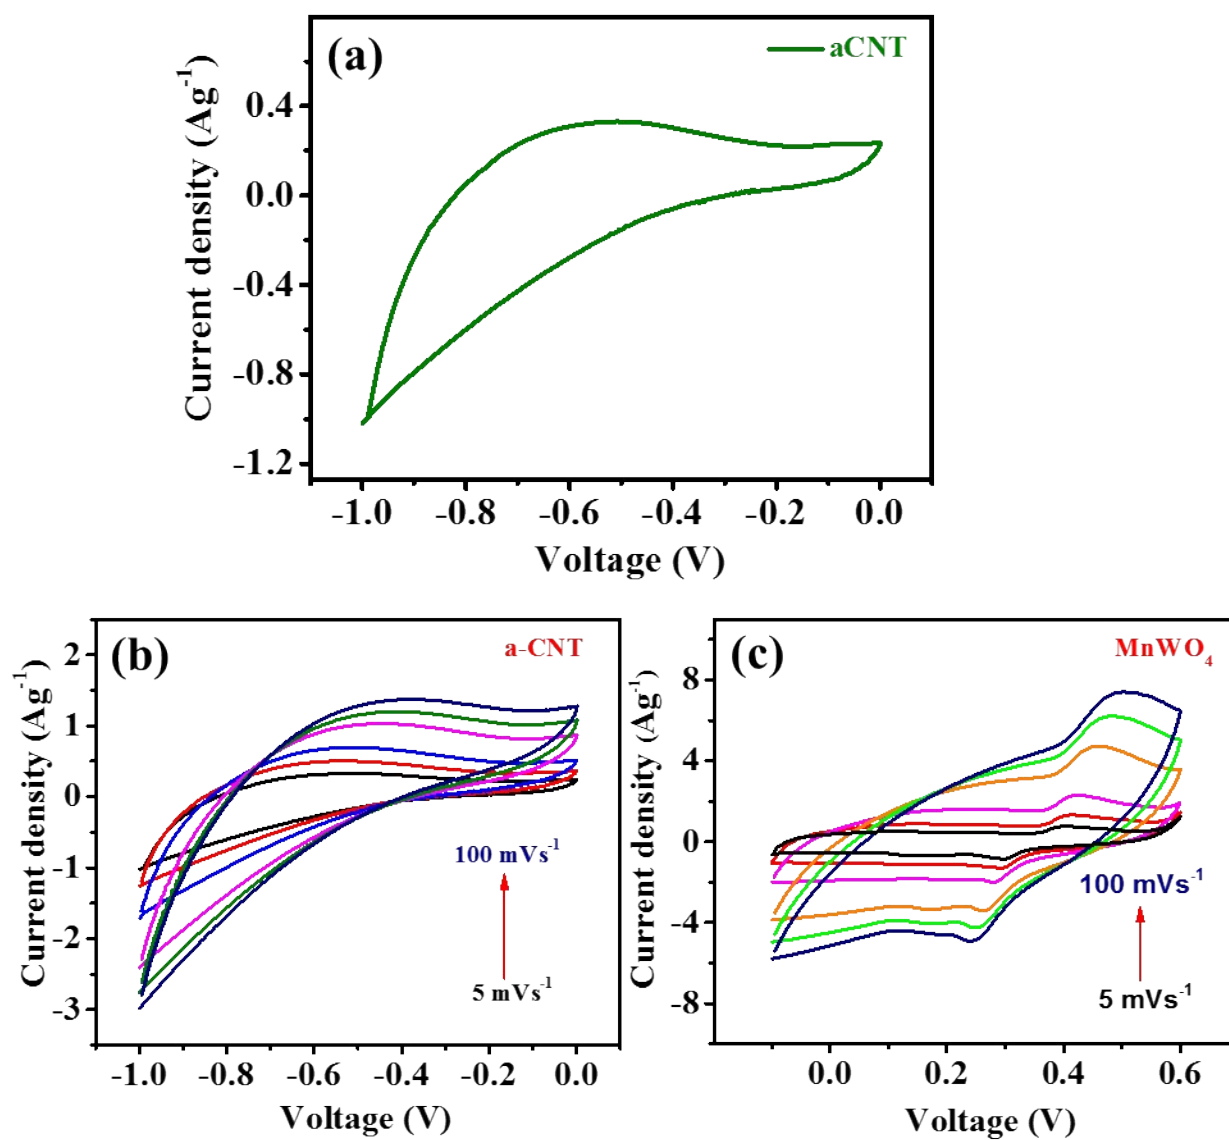

Figure S7: CV curves of (a) aCNT at 5 $\text{mVs}^{-1}$ ; (b) aCNT and (b)  $\text{MnWO}_4$  at different scan rates.

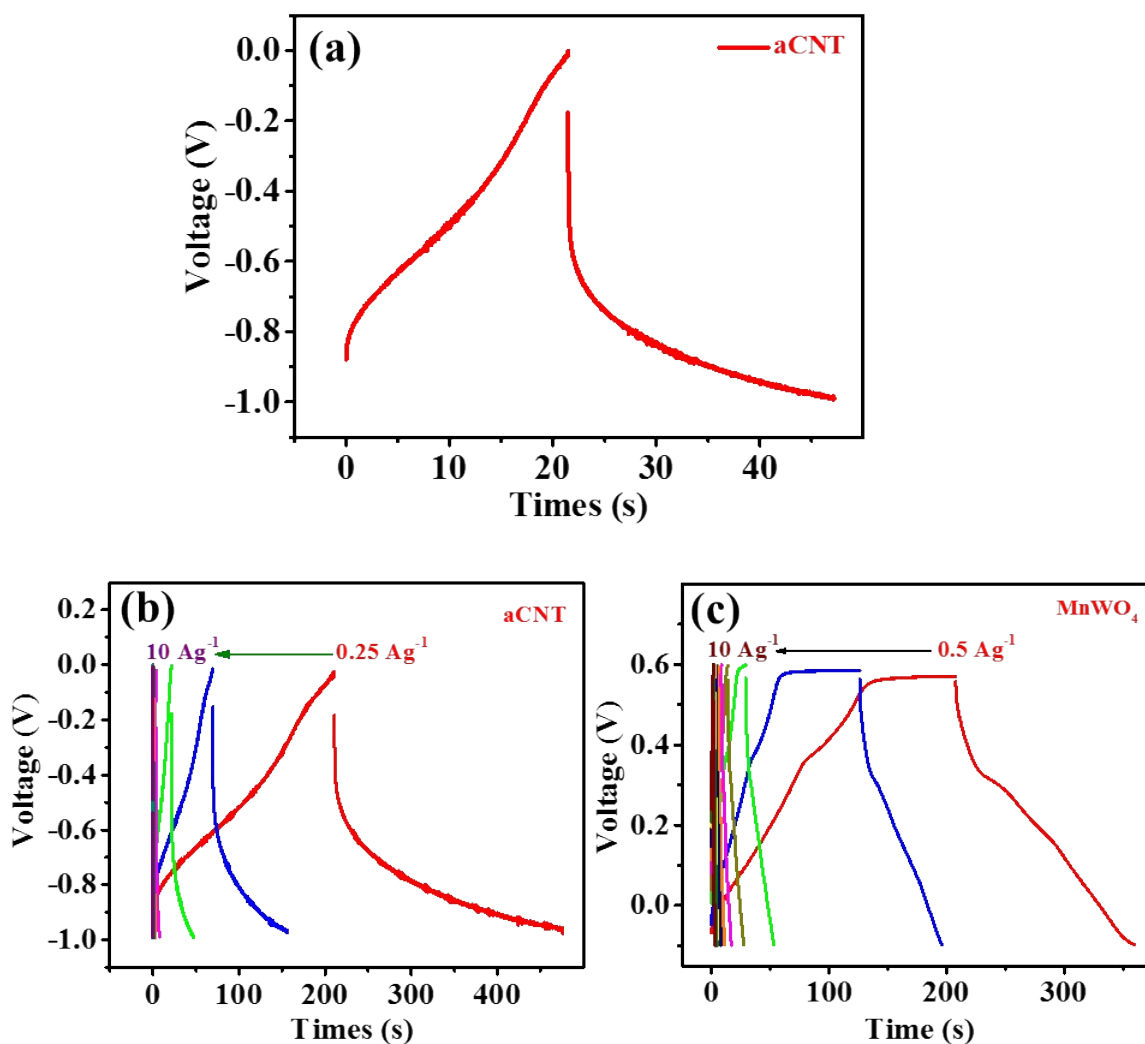

**Figure S8:** GCD curves of (a) aCNT at 1 Ag<sup>-1</sup>; (b) aCNT and (c) MnWO<sub>4</sub> at different current density.

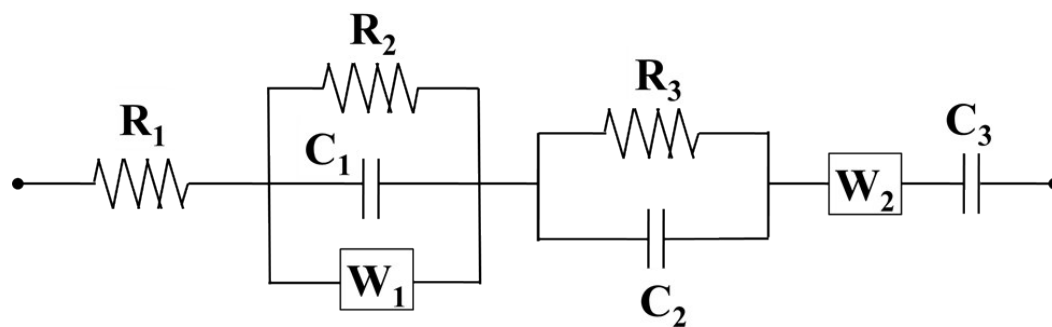

**Figure S9:** Equivalent circuit which is used to fit the EIS spectra.

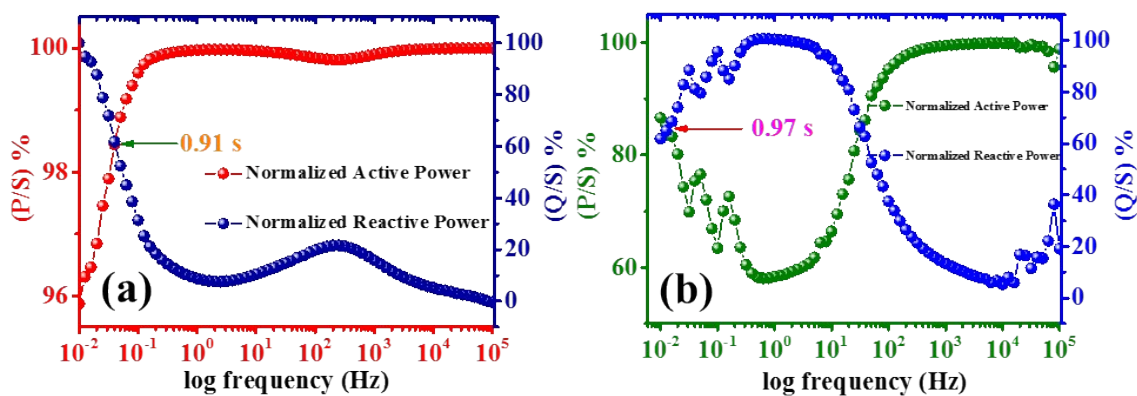

**Figure S10:** Active power and reactive power of (a)  $\text{MnWO}_4\text{-aCNT}$  and (b)  $\text{MnWO}_4$ .

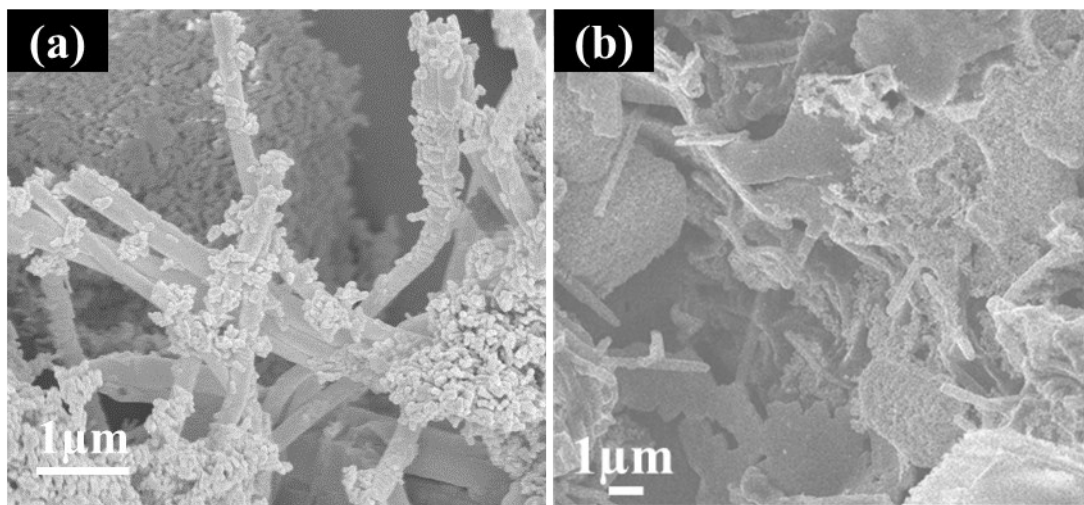

**Figure S11:** FESEM image of the hybrid before and after 15000 cycles.

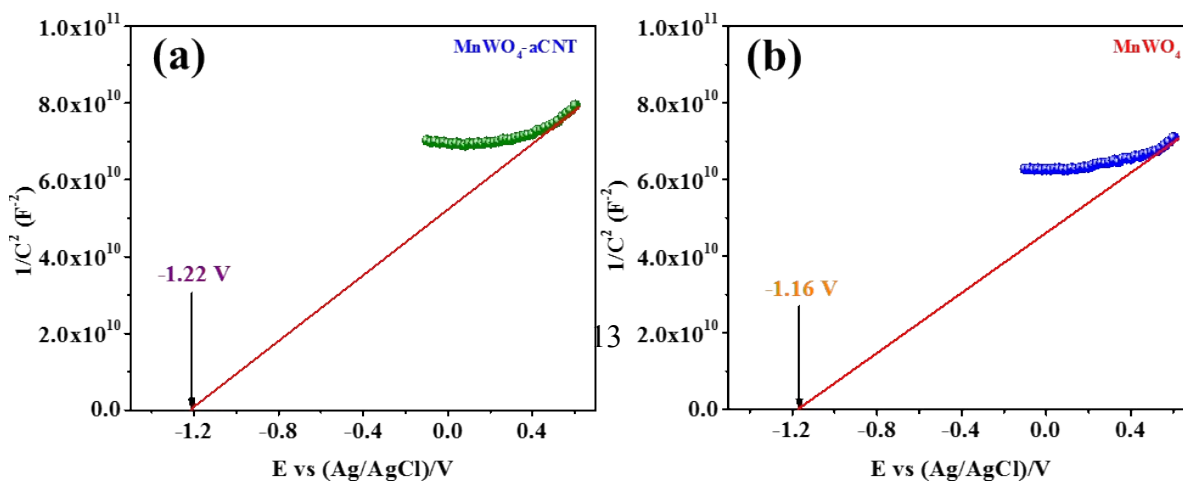

**Figure S12:** Mott Schottky plot of the (a)  $\text{MnWO}_4\text{-aCNT}$  and (b)  $\text{MnWO}_4$ .

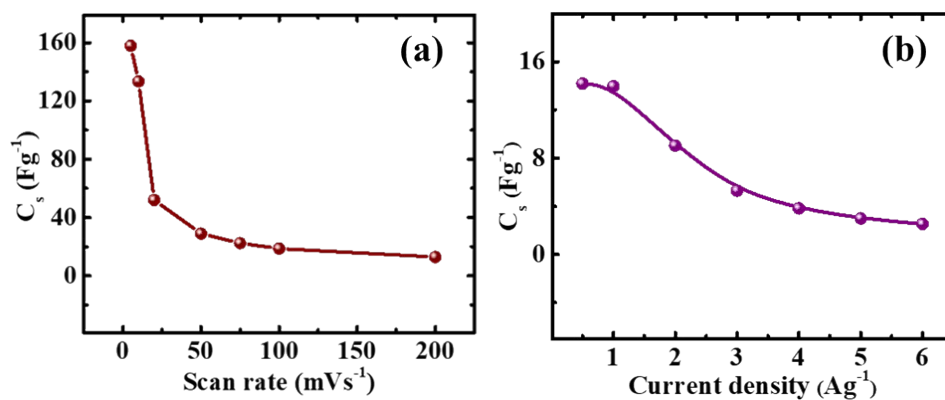

**Figure S13:** Variation in  $C_s$  of ASC with respect to (a) scan rate (b) current density.

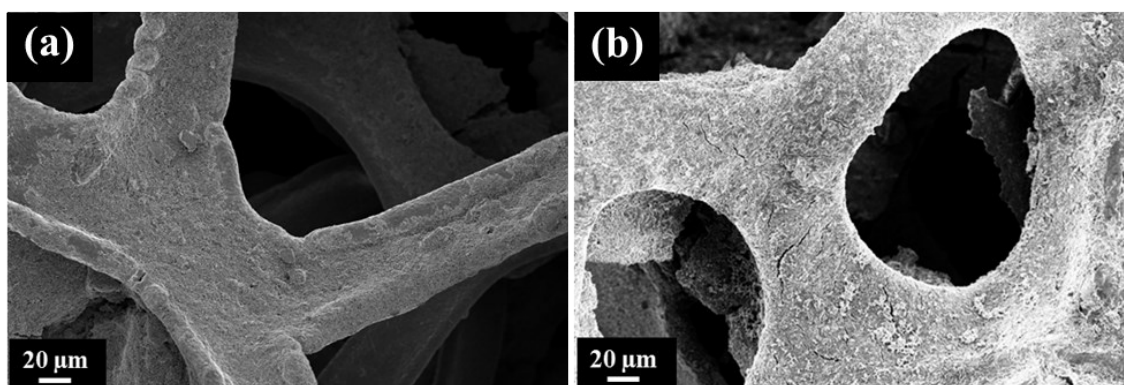

**Figure S14:** FESEM image of the nickel foam (a) before and (b) after 6000 cycles operation.

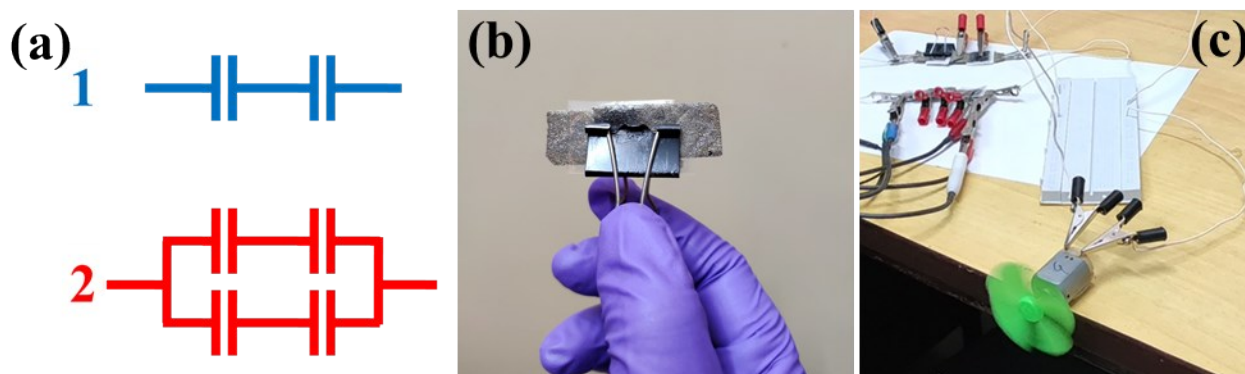

**Figure S15:** (a) ASC Device arrangement in series and series/parallel; (b) single ASC Device and (c) digital photographs of running motor fan.

#### Reference:

1. H. Yu, J. Wu, J. Lin, L. Fan, M. Huang, Y. Lin, Y. Li, F. Yu, and Z. Qiu, *ChemPhysChem*, 2013, **14**, 394-399.
2. H. Yu, L. Fan, J. Wu, Y. Lin, M. Huang, J. Lin, and Z. Lan, *RSC Adv.*, 2012, **2**, 6736-6740.
3. S. Roldán, Z. González, C. Blanco, M. Granda, R. Menéndez, and R. Santamaría, *Electrochim. Acta*, 2011, **56**, 3401-3405.
4. P. Bairi, K. Sardar, K. Chanda, M. Samanta, S. Thakur, K. Panigrahi, S. Sarkar, T. Paul, and K. K. Chattopadhyay, *ACS Appl. Energy Mater.*, 2020, **3**, 5984-5992.
5. Z. S. Wu, A. Winter, L. Chen, Y. Sun, A. Turchanin, X. Feng, and K. Müllen, *Adv. Mater.*, 2012, **24**, 5130-5135.
6. K. H. An, W. S. Kim, Y. S. Park, Y. C. Choi, S. M. Lee, D. C. Chung, D. J. Bae, S. C. Lim, and Y. H. Lee, *Adv. Mater.*, 2001, **13**, 497-500.
7. L. F. Chen, X. D. Zhang, H. W. Liang, M. Kong, Q. F. Guan, P. Chen, Z. Y. Wu, and S. H. Yu, *ACS nano*, 2012, **6**, 7092-7102.
8. S. R. S. Prabakaran, R. Vimala, and Z. Zainal, *J. Power Sources.*, 2006, **161**, 730-736.
9. M. R. Benzigar, S. Joseph, A. V. Baskar, D. H. Park, G. Chandra, S. Umopathy, S. N. Talapaneni, and A. Vinu, *Adv. Funct. Mater.*, 2018, **28**, 1803701.

10. X. Sun, M. Xie, J. J. Travis, G. Wang, H. Sun, J. Lian, and S. M. George, *J. Phys. Chem. C*, 2013, **117**, 22497-22508.
11. J. Tang, J. Shen, N. Li, and M. Ye, *J. Alloys Compd.*, 2016, **666**, 15-22.
12. J. Yesuraj, E. Elanthamilan, B. Muthuraaman, S. A. Suthanthiraraj, and J. P. Merlin, *J. Electron. Mater.*, 2019, **48**, 7239-7249.
13. F. Li, X. Xu, J. Huo, and W. Wang, *Mater. Chem. Phys.*, 2015, **167**, 22-27.
14. J. Chu, D. Lu, X. Wang, X. Wang, and S. Xiong, *J. Alloys Compd.*, 2017, **702**, 568-572.
15. B. G. S. Raj, J. Acharya, M. K. Seo, M. S. Khil, H. Y. Kim, and B. S. Kim, *Int. J. Hydrog. Energy*, 2019, **44**, 10838-10851.
